1 **Potential of Synthetic Aperture Radar Sentinel-1 time series for the**  
2 **monitoring of phenological cycles in a deciduous forest**

3

4 **Kamel Soudani<sup>1</sup>, Nicolas Delpierre<sup>1,2</sup>, Daniel Berveiller<sup>1</sup>, Gabriel Hmimina<sup>3</sup>, Gaëlle**  
5 **Vincent<sup>1</sup>, Alexandre Morfin<sup>1</sup>, Éric Dufrêne<sup>1</sup>**

6

7 <sup>1</sup> Université Paris-Saclay, CNRS, AgroParisTech, Ecologie Systématique et Evolution, 91405,  
8 Orsay, France.

9 <sup>2</sup> Institut Universitaire de France (IUF).

10 <sup>3</sup> Laboratoire de Météorologie Dynamique, IPSL, CNRS/UPMC, Paris, France.

11 \* Correspondence: [kamel.soudani@universite-paris-saclay.fr](mailto:kamel.soudani@universite-paris-saclay.fr)

12 **Abstract:**

13 Annual time-series of the two satellites C-band SAR (Synthetic Aperture Radar) Sentinel-1  
14 A and B data over five years were used to characterize the phenological cycle of a temperate  
15 deciduous forest. Six phenological markers of the start, middle and end of budburst and leaf  
16 expansion stage in spring and the leaf senescence in autumn were extracted from time-series of  
17 the ratio (VV/VH) of backscattering at co-polarization VV (vertical-vertical) and at cross  
18 polarization VH (vertical-horizontal). These markers were compared to field phenological  
19 observations, and to phenological dates derived from various proxies (Normalized Difference  
20 Vegetation Index NDVI time-series from Sentinel-2 A and B images, *in situ* NDVI  
21 measurements, Leaf Area Index LAI and litterfall temporal dynamics). We observe a decrease  
22 in the backscattering coefficient ( $\sigma^0$ ) at VH cross polarization during the leaf development and  
23 expansion phase in spring and an increase during the senescence phase, contrary to what is  
24 usually observed on various types of crops. In vertical polarization,  $\sigma^0$ VV shows very little  
25 variation throughout the year. S-1 time series of VV/VH ratio provides a good description of  
26 the seasonal vegetation cycle allowing the estimation of spring and autumn phenological  
27 markers. Estimates provided by VV/VH of budburst dates differ by approximately 8 days on  
28 average from phenological observations. During senescence phase, estimates are positively

29 shifted (later) and deviate by about 20 days from phenological observations of leaf senescence  
30 while the differences are of the order of 2 to 4 days between the phenological observations and  
31 estimates based on *in situ* NDVI and LAI time-series, respectively. A deviation of about 7 days,  
32 comparable to that observed during budburst, is obtained between the estimates of senescence  
33 from S-1 and those determined from the in situ monitoring of litterfall. While in spring, leaf  
34 emergence and expansion described by LAI or NDVI explains the increase of VV/VH (or the  
35 decrease of  $\sigma^0_{\text{VH}}$ ), during senescence, S-1 VV/VH is decorrelated from LAI or NDVI and is  
36 better explained by litterfall temporal dynamics. This behavior resulted in a hysteresis  
37 phenomenon observed on the relationships between VV/VH and NDVI or LAI. For the same  
38 LAI or NDVI, the response of VV/VH is different depending on the phenological phase  
39 considered. This study shows the high potential offered by Sentinel-1 SAR C-band time series  
40 for the detection of forest phenology for the first time, thus overcoming the limitations caused  
41 by cloud cover in optical remote sensing of vegetation phenology.

42

43 **Keywords:** Phenology; Forest, Sentinel 1; VV/VH; NDVI; LAI

44 **Highlights:**

- 45 • We study S-1 C-band dual polarized data potential to predict forest phenology
- 46 • Seasonal phenological transitions were accurately described by S-1 time-series
- 47 • Budburst and senescence dates from S-1 differ from direct observations by one week
- 48 • Time-series of S-1 VV/VH, NDVI, LAI and litterfall were also compared
- 49 • Relationships VV/VH vs NDVI and LAI show a hysteresis according to the season

50

## 51 **1. Introduction**

52 In forest ecosystems, the opening of buds (“budburst”) in spring and the coloration and fall  
53 of leaves (“leaf senescence”) mark the start and the end of the photosynthetically active period  
54 and therefore play a key role in their productivity and carbon storage activity (Richardson et al.,  
55 2010). Historically, the timings of these phenological events have been monitored through  
56 direct and periodic human observations of trees in the field. However, this method is

57 time-consuming, laborious, non-standardized and subject to an observer effect (Schaber and  
58 Badeck, 2002). Alternative indirect field techniques (RGB camera, proximal remote sensing  
59 systems, micrometeorological radiation sensors, etc.) are also used to monitor the seasonal  
60 cycle of forest canopy (Soudani et al., 2020). However, phenological metrics derived from both  
61 direct field observations and indirect proximal techniques are spatially sparse and fail to describe  
62 the spatial and temporal variability in phenology due to the vegetation and micro-climate  
63 diversity (Soudani et al., 2012). Field observations also target a limited set of species and may  
64 not always be representative at the ecosystem scale. Satellite based remote sensing, because of  
65 its great potential for spatial sampling, constitutes the main approach for estimating and  
66 mapping phenological metrics at local to regional scales (Reed et al., 2003). However, the  
67 assessment of this potential has been severely limited by the difficulty of linking  
68 satellite-derived phenological metrics to field phenological observations, mainly due to  
69 temporal and spatial scale mismatches (Fisher et al., 2006). A few years ago, constellations of  
70 identical satellites such as SPOT 6/7, Pleiades, and more particularly, Sentinel-2 A and B in the  
71 optical domain and Sentinel-1 A and B in the C-band microwave frequency (5.405 GHz, 5.6  
72 cm) have been launched, with the aim of overcoming these scale-related limitations by allowing  
73 image acquisitions with both good temporal and spatial resolutions under the same viewing  
74 angles (Ose et al., 2016). S2-A and S2-B, launched in 2015 and in 2017, that occupy the same  
75 orbit but 180° apart from each other, provide a temporal resolution of 10 days each and around  
76 5 days with S2-A and S2-B together, reduced to 2-3 days over mid-latitudes regions. Spatial  
77 resolution of S2 varies from 10 m to 60 m depending on the spectral band. SAR (Synthetic  
78 Aperture Radar) S-1A and S-1B, launched in 2015 and 2016 respectively, together offer a  
79 temporal resolution about 3 days at the equator, > 1 day at high latitude and about 2 days in  
80 Europe combining ascending and descending orbits at a spatial resolution of 10 m in  
81 Interferometric mode (ESA, Sentinel-1 user guide). Temporal resolution of S-2 and S-1 are  
82 therefore comparable to the occurrence of phenological observations collected in the field over  
83 forest ecosystems, usually once or twice a week, and the spatial resolutions of 10 m and 20 m  
84 are also comparable to the size of adult forest tree crowns.

85 Typically, vegetation phenological metrics are derived from the analysis of time-series of  
86 spectral vegetation indices (SVI) in the optical domain but SVI are subject to varying degrees of  
87 uncertainty due mainly to cloud cover and cloud shadow contamination, which either  
88 introduces random noise that is difficult to correct or makes the data totally unavailable (Hird  
89 and McDermid, 2009; White and Wulder, 2013). Therefore, the temporal resolution of the  
90 satellite-based optical sensors is nominal since the availability of data depends on sky  
91 conditions (Wang and Atkinson, 2018; Sudmanns et al., 2019). In comparison to optical remote  
92 sensing, the main advantage of SAR remote sensing is its ability to pass through clouds with  
93 negligible attenuation. Temporal resolution is therefore maintained from year to year or from  
94 one region to another regardless of cloud conditions.

95 While the potential of S-2 for estimating forest phenology has been evaluated in many  
96 studies (Lange et al., 2017; Vrieling et al., 2018; Kowalski et al., 2020; Bolton et al., 2020),  
97 little is known about the potential of SAR data in general and S-1 in particular. The potential of  
98 S-1 has previously been assessed to monitor phenology, productivity and cultural practices in  
99 crops and meadows (Vavlas et al., 2020; Song and Wang, 2019; Stendardi et al., 2019), but at  
100 the exception of the study by Rüetschi et al. (2018), to the best of our knowledge no other  
101 studies which have compared phenological estimates derived from S-1 with field phenological  
102 observations in deciduous forests. In Rüetschi et al. (2018), few field phenological observations  
103 were available and, as pointed out by the authors, the temporal resolution of used S-1  
104 time-series (24 days) was not adequate for an accurate assessment. In another studies,  
105 Dostálová et al. (2016; 2018) and Frison et al. (2018) analyzed time-series of S-1 over  
106 deciduous and coniferous forest stands. However, these studies were limited to the analysis of  
107 the temporal patterns of the S-1 data and did not focus on their exploitation for the detection of  
108 phenological dates.

109 In this paper, our first objective is to investigate the potential of time series of S-1 A&B  
110 C-band dual-polarized (VV and VH) SAR images to describe the phenological patterns of a  
111 temperate deciduous forest, and to estimate the timings of the main spring and autumn  
112 phenological stages. To this aim, we compared S1-based spring and autumn phenological

113 estimates to in situ phenological observations by human observers and to estimates from  
114 alternative in situ indirect approaches including daily time-series of proximal NDVI  
115 (normalized difference vegetation index), daily time-series of LAI (Leaf Area Index) estimated  
116 from continuous radiation measurements and time-series of NDVI derived from S-2 A&B  
117 images. During the autumnal phenological stage, we also compared S1-based phenological  
118 dates to temporal dynamics of litterfall monitored in the field. Finally, and as a secondary  
119 objective of this paper, we further analyzed the sudden and abrupt changes observed in  
120 backscattering coefficients in the light of continuous measurements of precipitation and soil  
121 water content at different depths.

122

## 123 **2. Materials and Methods**

### 124 2.1. Site description

125 The study site is the Fontainebleau-Barbeau forest station (48°28'26"N, 2°46'57"E),  
126 located 53 km southeast of Paris (Supplementary Figure S1). Briefly, Fontainebleau-Barbeau  
127 forest is mainly composed of sessile oak (*Quercus petraea* (Matt.) Liebl), with an understory of  
128 hornbeam (*Carpinus betulus* L.). The stand age is about 150 years and the dominant height is 27  
129 m. The topography is flat, and the ground elevation is about 103 m a.s.l. On this site which  
130 belongs to the pan-European ICOS Ecosystem network (Integrated Carbon Observation  
131 System, ICOS code FR-Fon), a 35-m high tower has been installed in 2005, measuring energy  
132 and matter (CO<sub>2</sub> and H<sub>2</sub>O) exchanges between the vegetation and the atmosphere using the  
133 eddy-covariance technique. More details can be found in Delpierre et al. (2016) and at  
134 <http://www.barbeau.u-psud.fr/index-fr.html>.

135

### 136 2.2. Data

#### 137 2.2.1. SAR Sentinel-1 C-band time-series

138 Time-series of SAR Sentinel-1 (A&B) backscattering coefficient ( $\sigma^0$ ) at VH and VV  
139 polarization were composed using the Google earth engine (GEE) cloud. A total of 470 dual  
140 polarized (VV and VH) images covering the period from 01/01/2015 to 31/12/2019 were used.

141 225 scenes are in ascending orbit and 245 in descending orbits. Before September 2016 (day of  
142 year 278), S-1 time series are composed of S-1A images only. The number of S-1 images used  
143 per year is 43 images in 2015, 74 in 2016, 119 in 2017, 117 in 2018 and 117 in 2019; thus an  
144 average of about 1 image every 8 days in 2015, 1 image every 5 days in 2016 and 1 image every  
145 3 days in 2017/2018 and 2019. As mentioned above, the number of images available in 2015 is  
146 low since only S-1A was operational. Images are in GRD (Ground Range Detected) format, in  
147 interferometric wide swath mode (IW), calibrated and ortho-corrected using the Sentinel-1  
148 Toolbox at 10-m spatial resolution. Viewing incidence angle is about 39.30°. Each image  
149 contains two layers of the backscattering coefficient  $\sigma_0$  in VV and VH dual polarization  
150 converted in decibels unit (dB). Time-series of  $\sigma_0$  were composed based on their means within a  
151 circular buffer of 50 m in radius, centered on the Fontainebleau-Barbeau flux tower (Fig. S1).  
152 The number of S-1 pixels within the buffer is about 78 pixels. To remove noise, time series of  
153 VV/VH ratio in dB unit, calculated as ( $\sigma^0_{VV}$  (dB) -  $\sigma^0_{VH}$  (dB)), were filtered using the  
154 Savitzky-Golay filtering method under the MATLAB software. The best filtering was obtained  
155 with the following parameters: 2nd polynomial order and 5 or 9 window length.

156

### 157 2.2.2. Sentinel 2 A & 2B time-series

158 A total of 284 Sentinel-2 (A&B) images (193 S-2A and 91 S-2B) from the S-2 L1-C TOA  
159 reflectance product were processed under GEE to generate NDVI time series using bands 4  
160 (red) and 8 (near infrared) over the period 2015-2019. The corresponding wavelengths are  
161 respectively 664.5 nm (S-2A) / 665 nm (S-2B) for the red band and 835.1 nm (S-2A) / 833 nm  
162 (S-2B) for the near infrared band. The NDVI was calculated per pixel and averaged over the  
163 same 50 m diameter buffer as for S-1 A&B. The spatial resolution of the S-2 red and near  
164 infrared bands is 10 m and the number of pixels within the circular buffer is the same as for S-1  
165 (78 pixels). Pre-filtering of cloudy pixels was performed using the QA60 flag, bits 10 and 11,  
166 which provide information about clouds and cirrus at the 60 m pixel scale. Only cloudy and  
167 cirrus-free pixels within the buffer were used in the calculation of NDVI. The number of S-2  
168 images per year is 4 images in 2015, 11 in 2016, 17 in 2017, 28 in 2018 and 31 in 2019. From

169 June 2015 to March 2017, only S-2A was operational, explaining the low number of images  
170 available for these two years. The year 2015 was excluded from the analysis due to the  
171 insufficient number of images.

172

### 173 2.2.3 In situ data

#### 174 2.2.3.1. Field phenological observations

175 A description of field phenological data is given in Denéchére et al. (2019), Delpierre et al.  
176 (2020) and Soudani et al. (2020). Briefly, phenological observations were conducted according  
177 to two complementary sampling protocols. The first protocol (hereafter *intensive*) protocol was  
178 conducted from 2015 to 2017 for both spring and autumn. In this protocol, temporal dynamics  
179 of spring (percentage of open buds) and autumn (percentage of colored and/or fallen leaves)  
180 phenological transitions were determined at tree level, on 30 to 66 trees from the early signs to  
181 the end of each phenological stage. The second protocol (hereafter *extensive*) protocol was  
182 conducted on 2018 and 2019, during the spring phase only. In this protocol, we determined the  
183 date of budburst visually at the whole plot level surrounding the flux tower on about 100 trees.  
184 We considered that a tree had reached budburst when 50% of its crown showed open buds.  
185 Budburst of the whole plot was reached when 50% of sampled trees have reached budburst. All  
186 observations were achieved using binoculars, on a bi-weekly basis during the budburst  
187 (BB-OBS) and weekly during the senescence (LS-OBS). Hence the uncertainties are 3.5 days  
188 for BB-OBS and 7 days for LS-OBS.

189

#### 190 2.2.3.2. Narrow-band NDVI data

191 The NDVI is calculated as follows:  $NDVI = (NIR - R)/(NIR + R)$ . R and NIR are  
192 radiances in the red and the near infrared bands, respectively. Radiances are measured using a  
193 laboratory made NDVI sensor. A description of this sensor and its use for estimating  
194 phenological metrics in various biomes is given in Soudani et al. (2012; 2020) and Hmimina et  
195 al. (2013). Briefly, the sensor is positioned at the top of the flux tower in the  
196 Fontainebleau-Barbeau forest, about 7 m above the canopy, pointing downwards and inclined

197 about 20-30° from vertical and facing south to avoid the hot-spot effects in canopy reflectance  
198 when the viewing direction is collinear with the solar direction. The field of view of the sensor  
199 is 100° and the observed area is a few tens of m<sup>2</sup>. Measurements are acquired continuously  
200 every half-hour. Noisy data, due mainly to rainfall and very low radiation conditions, were  
201 removed according to the procedure described in Soudani et al. (2012). Daily average of filtered  
202 NDVI data acquired between 10h and 14h (UT) is considered to minimize daily variations in  
203 solar angle.

204

#### 205 2.2.3.3. Leaf Area Index LAI

206 For the different years, the maximum of leaf area index reached during the summer is  
207 determined directly using the litter collection method. 20 litter traps of 0.5 m<sup>2</sup> each were used  
208 according to the standard protocol adopted within the framework of the European ICOS  
209 Ecosystem network (Gielen et al. 2018). The litter collection during the autumn is carried out at  
210 a one-week time step, thus allowing, in addition to the determination of maximum LAI, the  
211 description of temporal dynamics of surface area of fallen leaves from the first fallen leaves  
212 until the end of the autumn season.

213 Continuous estimation of canopy LAI was also achieved by applying the Beer-Lambert  
214 law to continuous measurements of incoming and beneath canopy radiation in the PAR  
215 (Photosynthetically active radiation) spectral range at a half-hourly time step. Beneath canopy  
216 radiation is measured using 15 sensors, installed on the ground-area surrounding the flux tower  
217 to ensure a robust spatial sampling of the radiation transmitted through the canopy. Since the  
218 application of BL's law requires the prior determination of the extinction coefficient K, the  
219 latter was estimated from average LAI maximum determined from the litter collection method  
220 and average transmitted PAR during the summer growing season. To describe the temporal  
221 dynamics of LAI, this coefficient was assumed to be constant throughout the year. More details  
222 about the LAI calculation from radiation measurements are given in Soudani et al. (2020).

223

#### 224 2.2.3.4. Precipitations and soil moisture content



225        Rainfall and soil water content were measured at a half-hourly resolution. Rainfall is  
226        automatically measured using a rain gauge installed at the top of the tower (Model R01 3029,  
227        PRECIS MECANIQUE SAS, France). Soil water content is automatically measured every half  
228        hour and every 10 cm from the topsoil to 150 cm below the soil surface using 4 probes installed  
229        in the vicinity of the tower (SENTEK, Enviroscan system).

230

### 231        2.3. Methods

#### 232        2.3.1. Extraction of phenological metrics in spring and autumn from time-series

233        Six phenological metrics were extracted from daily time-series of S-1 VV/VH, in situ  
234        NDVI, S-2 NDVI, LAI and field phenological observations collected according to the intensive  
235        protocol. Three phenological metrics were also extracted from litterfall temporal dynamics.  
236        The extraction is carried out according to Soudani et al. (2008). Briefly an asymmetric double  
237        sigmoidal function (ADS) was fitted to time-series according to the following equation:

$$Vv(t) = (w_1 + w_2) + \frac{1}{2}(w_1 - w_2)[\tanh(w_3(t - u)) - \tanh(w_4(t - v))]$$

238        Vv (t) is the considered vegetation variable (VV/VH, NDVI from S-2 and in situ measurements,  
239        LAI, % of open buds, % of colored and/or fallen leaves). t is the time (day of year). tanh is the  
240        hyperbolic tangent and  $w_1$ ,  $w_2$ ,  $w_3$ ,  $w_4$ ,  $u$ ,  $v$  are the fitted parameters.  $(w_1+w_2)$  is the Vv minimum  
241        in unleafy season.  $(w_1-w_2)$  is the total amplitude of the Vv seasonal cycle. The six phenological  
242        markers are named as follows: SOS, MOS and EOS for the start, middle, and end of season in  
243        spring and SOF, MOF and EOF for the start, middle and end of season in autumn, according  
244        Klosterman et al. (2014). The parameters were fitted by minimizing the sum of squares of  
245        differences between predicted and measured Vv. To constrain the fit at the end of the growing  
246        season, each year of VV/VH, NDVI and LAI data was extended to the winter of the following  
247        year. All dates were determined using the ADS function fitted to the data, except for SOF and  
248        EOF dates determined from litterfall temporal dynamics. For litterfall time-series, MOF is  
249        determined using the ADS function but SOF and EOF are determined directly from the data,  
250        due to the poor quality of the fit on both sides of ADS function. SOF and EOF are, respectively  
251        the dates corresponding to 10% and 90% of the total litterfall.

252

### 253 2.3.2. Statistical analysis

254 The performance of VV/VH time-series to predict phenological events in spring and  
255 autumn was evaluated with respect to the field phenological observations using the mean bias  
256 error (MBE) and the mean absolute deviation (MAD) between estimated ( $P_i$ ) and observed  
257 dates ( $O_i$ ) for the different years ( $N$ ), calculated as follows:

$$258 \quad MBE = \frac{1}{N} \sum_{i=1}^N (P_i - O_i)$$

$$MAD = \frac{1}{N} \sum_{i=1}^N |P_i - O_i|$$

259 Statistical significance is determined at 5% probability level using one-tailed and two-tailed  
260 Student's t-test for comparison of means. When linear regressions between different variables  
261 are investigated,  $R^2$  is used to assess the strength of these relationships. Statistical analysis was  
262 done using the R software.

263

## 264 3. Results

### 265 3.1. SAR Sentinel-1 VV/VH time-series

266 S-1 VV/VH time-series are shown in Figure 1.  $\sigma^0$  in VV and VH polarization in ascending  
267 and descending orbits are shown in Figure S2, in supplementary material. Using S-1 original  
268 data (before filtering, Figure S2 for more details), the coefficient of backscattering  $\sigma^0$  is on  
269 average, over all years, about -8.54 dB ([-10.73 , -5.07]) in VV polarization and about -14.40  
270 dB ([-17.48 , -10.45]) in VH. The difference between the two polarization is very highly  
271 significant ( $P < 0.001$ ). Considering both ascending and descending orbits, differences in  
272 means are about 0.5 dB in both polarizations but are statistically significant. However,  
273 differences between means are not significant for VV/VH ( $P < 0.34$ ). For this reason, S-1 data  
274 acquired at the two orbits are considered without distinction in the following.

275 On the other hand, the analysis of the temporal dynamics of  $\sigma^0$ VH and  $\sigma^0$ VV shows  
276 intermittent sudden and abrupt changes. Weak relationships are observed between  $\sigma^0$ VV,  
277  $\sigma^0$ VH, VV/VH and soil moisture between 0-10 cm over the year ( $R^2$  0.07; 0.26 and 0.148,  
278 respectively) but these relationships disappear when separating the summer leafy and winter

279 unleafy seasons in the analysis (Figures S3 & S4). During the summer period, although weak, a  
280 significant positive relationship was obtained between rainfall and  $\sigma^0$ VH ( $R^2 = 0.124$ ,  $P <$   
281  $0.008$ ).

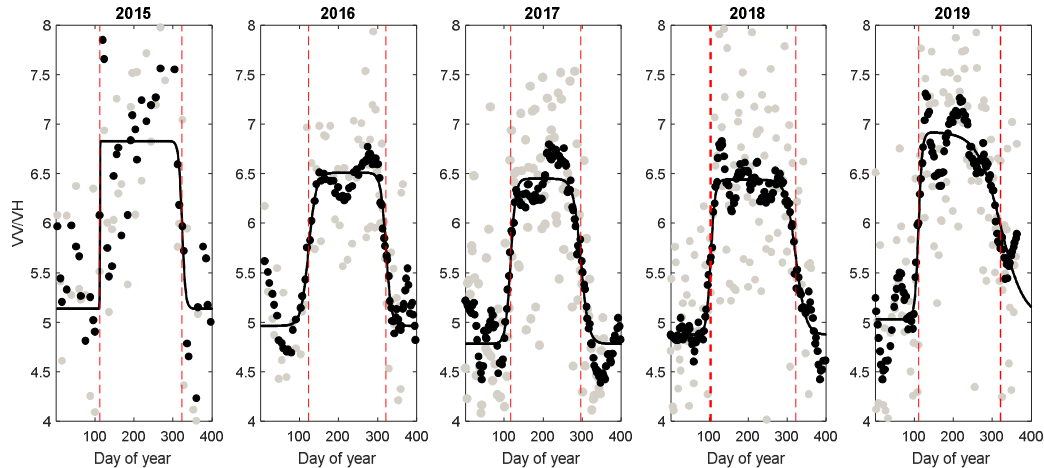

282  
283 Figure 1: Sentinel-1 VV/VH time-series (dB): grey circle: original data; black circle: data  
284 smoothed using a Savitzky-Golay filter; continuous black curve: asymmetric double sigmoid  
285 function (ADS) fitted to VV/VH smoothed data. Red vertical bars: estimated phenological  
286 transition (MOS and MOF) dates from VV/VH time-series based on ADS function.

287

288 Figure 1 shows that S-1 VV/VH temporal patterns reproduce the forest phenology  
289 observed in deciduous forests with good accuracy. Four phases can be distinguished: a winter  
290 phase with low VV/VH values, a rapid transition phase during spring when VV/VH increases  
291 quickly, a plateau during the main growing season in summer and a fourth phase of VV/VH  
292 decline which coincides with the phase of leaf senescence and leaf fall. In comparison with the  
293 backscattering coefficients  $\sigma^0$ VH or  $\sigma^0$ VV, the VV/VH ratio is more dynamic and seems to be  
294 driven by VH more than VV polarization (Figure S2).

295 Indeed, the backscatter coefficient  $\sigma^0$ VH decreases during spring phenological transitions,  
296 and remains relatively stable during the summer for which LAI remains stable and increases  
297 again during autumn phenological transitions (Figure S2). Between its winter maximum and  
298 summer minimum,  $\sigma^0$ VH varies on average from -13.36 dB (standard deviation 0.871 dB) in  
299 winter [doy 330-98 next year] to -15.16 dB (standard deviation 0.851 dB) in summer [doy  
300 128-270]. The decrease is of 1.80 dB, but  $\sigma^0$ VH is highly significantly lower in summer than in  
301 winter ( $P < 0.001$ , one-sided t-test). In vertical polarization,  $\sigma^0$ VV decreases from -8.43 dB

302 (0.732 dB) in winter to -8.51 (0.710 dB) in summer (Figure S2). The decrease is only about 0.15  
303 dB but is statistically significant at 5% ( $P < 0.048$ ). In the VV/VH, driven by changes in  $\sigma^0_{VH}$ ,  
304 the average increases from 4.93 dB (0.77 dB) in winter to 6.56 dB (0.79 dB) in summer. Also,  
305 VV/VH is very significantly higher in summer than in winter ( $P < 0.001$ , one tailed t-test).

306

### 307 3.2. Phenological markers derived from SAR Sentinel-1 VV/VH time-series

308 The temporal dynamics of VV/VH strongly co-vary with the canopy phenological cycle, as  
309 assessed through various proxies (Figure 2). Summary statistics are given in Table 1 and  
310 estimated dates by year and for the six phenological metrics (SOS, MOS, EOS in spring and  
311 SOF, MOF and EOF in autumn) are given in Supplementary Material S5.

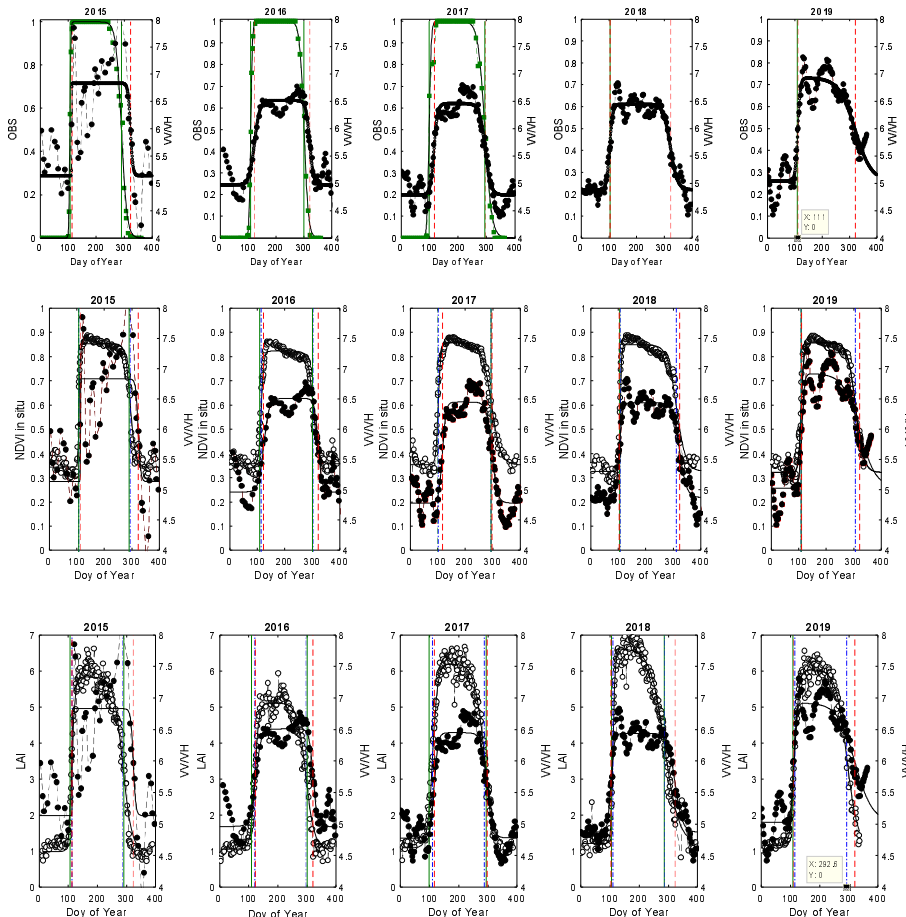

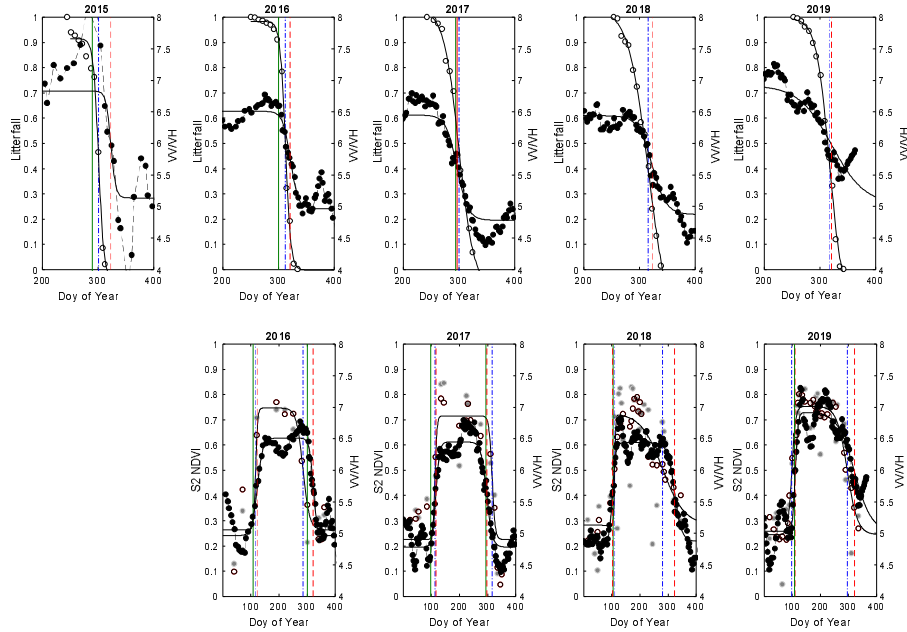

312 Figure 2: Sentinel-1 VV/VH time-series for all subplots (black filled circles – right axis).  
 313 Empty circles – left axis: from top to bottom – time-series of field phenological observations  
 314 (OBS from intensive protocol on 2015-2017), ground-based NDVI, Leaf Area Index (LAI),  
 315 Litterfall in autumn and Sentinel 2 NDVI. Vertical bars: observed phenological transition dates  
 316 in green (OBS from intensive and extensive protocols); estimated MOS and MOF phenological  
 317 transition dates based on ADS function using VV/VH time-series in red and predicted  
 318 phenological dates from in situ NDVI, LAI, S-2 NDVI (gray circle – removed using SG filter;  
 319 empty circle – used) and litterfall in blue.  
 320

|                                  | Onset of greenness<br>and leaf expansion |                    |                    | Leaf senescence<br>and fall |                    |                    |
|----------------------------------|------------------------------------------|--------------------|--------------------|-----------------------------|--------------------|--------------------|
|                                  | SOS                                      | MOS                | EOS                | SOF                         | MOF                | EOF                |
| Phenological<br>observations (*) | 97<br>(89-102)                           | 105.5<br>(99-109)  | 110.5<br>(108-115) | 272<br>(267-282)            | 294.5<br>(290-300) | 316.5<br>(321-321) |
| S-1 VV/VH                        | 100<br>(89-110)                          | 113.5<br>(104-123) | 124.5<br>(113-144) | 287<br>(252-312)            | 317<br>(297-323)   | 345<br>(318-388)   |
| In situ NDVI                     | 98<br>(90-103)                           | 107.5<br>(101-113) | 115.5<br>(111-123) | 270<br>(255-280)            | 301<br>(293-311)   | 331.5<br>(314-349) |
| S-2 NDVI                         | 102.5<br>(83-115)                        | 110<br>(99-118)    | 119<br>(114-124)   | 252<br>(192-303)            | 294<br>(281-316)   | 338<br>(320-368)   |
| LAI                              | 98.5<br>(90-103)                         | 114<br>(111-120)   | 128<br>(119-137)   | 248.5<br>(231-263)          | 290<br>(287-296)   | 330.5<br>(322-341) |
| Litterfall                       | -                                        | -                  | -                  | 281<br>(266-298)            | 309<br>(300-317)   | 323<br>(309-331)   |

321 Table 1: Summary statistics (mean and min-max) of observed and estimated phenological  
 322 dates. SOS, MOS and EOS for the start, middle, and end of season in spring and SOF, MOF and  
 323 EOF for the start, middle and end of season in autumn. (\*) For field phenological observations,  
 324 MOF is determined for the five years from the extensive protocol. SOS, EOS, SOF, MOF and  
 325 EOF, are determined for years 2015 to 2017 using the intensive protocol.

326

327 Figure 3 illustrates the interannual variations in estimated budburst (MOS) and senescence  
 328 dates (MOF) for the different approaches.

329

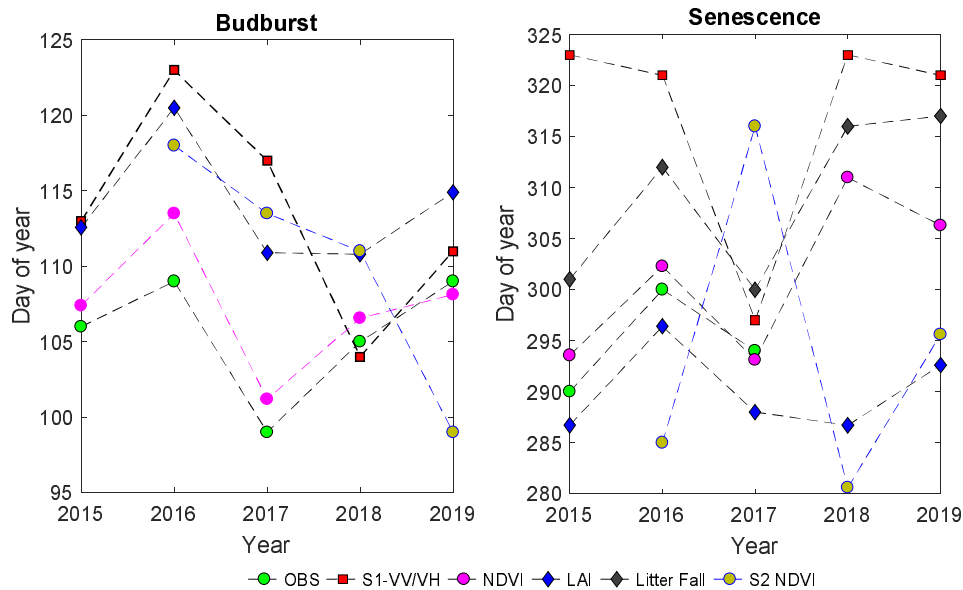

330

331 Figure 3: Average dates of budburst (a- left) and senescence (b- right) based on MOS and MOF,  
 332 respectively.

333

334 During the spring transition phenological stage, and based on MOS criterion, VV/VH  
 335 time-series lag about 8 days behind the observed budburst date (MBE and MAD, 8.5 and 8 days  
 336 respectively; Figure 3a). This lag with observed budburst dates is similar to the lag of MOS  
 337 retrieved from LAI time-series (MBE and MAD of about 8.5 days) and is slightly lower by  
 338 about 1.5 days in comparison to the lag between MOS estimates retrieved from S-2 NDVI  
 339 time-series (for S-2 NDVI, MBE and MAD of about 10 days and 5 days, respectively). The best  
 340 estimates are obtained using in situ NDVI time-series for which MBE and MAD are about 2  
 341 days. During the autumnal phenological phase, for the three years for which continuous field  
 342 observations are available, VV/VH time-series provide estimates which are approximately 20  
 days later than the observed dates (Figure 3b) while the differences are of the order of 2 to 4

343 days between the observations and estimates based on in situ NDVI and LAI, respectively.  
 344 Interestingly, MOF derived from VV/VH differs by 7 days on average from MOF determined  
 345 from litterfall time series. Between S-1 and S-2 based estimates, MBE and MAD are  
 346 respectively of - 4 days (S2-based estimates later) and 7 days during the spring and -20 days  
 347 (S-2 earlier) and 30 days in autumn (Figure 3b, Table S5).

348 These differences between VV/VH estimates and those obtained using field phenological  
 349 observations and the other alternatives methods reflect different relationships between the  
 350 temporal dynamics of the VV/VH signal and canopy properties. Figure 4 illustrates the  
 351 relationships between VV/VH or LAI and in situ NDVI during four distinct phenological  
 352 stages: winter dormancy period, spring leaf emergence and expansion stage, summer growth  
 353 stage, and autumnal leaf senescence and fall. Four years, from 2016 to 2019, for which more S1  
 354 data are available and phenological estimates are more robust.

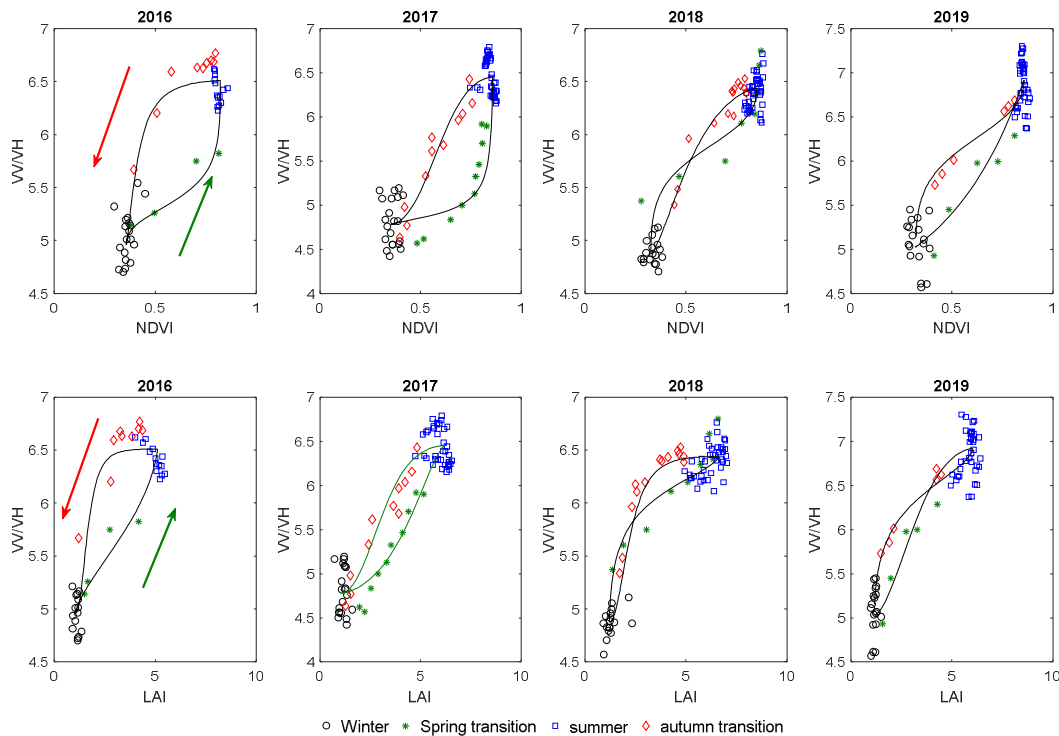

355  
 356 Figure 4: Relationships between VV/VH (dB) and in situ NDVI (top) and LAI (bottom)  
 357 according to the phenological stage. Symbols are measurements: winter (day of year: 330-98 of  
 358 the next year) in black circles; spring transition (day of year 98-128) in green stars; summer  
 359 growing season (day of year 128-270) in blue square; autumn transition (day of year 270-330)  
 360 in red diamond. Continuous curves are predicted values using the ASD function. Red and green

361 arrows give the directions of VV/VH trajectories during the autumn (red) and spring (green)  
362 phenological stages, respectively.

363

364 Figure 4 shows a positive relationship between VV/VH and both NDVI and LAI. These  
365 relationships are not unique and depend on the phenological stage considered. A hysteresis  
366 phenomenon can be noted as the VV/VH trajectories are not identical during the increase and  
367 the decrease in canopy leaf area as described using LAI or NDVI, during spring and autumn,  
368 respectively. For the same NDVI (or LAI), VV/VH is higher during the fall phase than during  
369 the spring phase.

#### 370 **4. Discussion**

371 Examination of the temporal dynamics of the VV/VH signal shows significant rapid  
372 variations that seem to be linked to rainy events (Figure 1, Figures S3 & 4). C-band sensitivity  
373 to precipitations intercepted and stored by the canopy during data acquisition has been shown in  
374 previous studies from measurements (Benninga et al., 2019; El Hajj et al., 2016; Proisy et al.,  
375 2000) and from simulations (Jong et al., 2016). As underlined above, the relationship between  
376 S-1 backscattering and soil water content is better in VH than in VV polarization and is only  
377 significant when both the unleafy and leafy seasons are combined (Figure S4). Therefore, this  
378 relationship seems to be caused more by the changes in canopy properties than by direct  
379 influences of soil moisture on backscatter coefficients. As also shown in Figure S3,  $\sigma^0_{VH}$  is  
380 more sensitive to the phenological cycle observed in deciduous forests while the temporal  
381 profile of  $\sigma^0_{VV}$  remains relatively stable throughout the year.  $\sigma^0_{VH}$  shows an average decrease  
382 of about 1.80 dB on average during summer in comparison to winter. This result agrees with the  
383 studies of Rüetschi et al. (2018), Dostálová et al. (2016; 2018) and Frison et al. (2018) in which  
384 they observe a lower backscattering coefficient in the S-1 VH polarization in summer than in  
385 winter in temperate deciduous forests. In Rüetschi et al. (2018), the differences observed on two  
386 oak stands and over two consecutive years ranged from 0.38 dB to 1.96 dB in VH polarization.  
387 In VV polarization, a lower average in summer than in winter was observed on a single oak  
388 stand. The difference was of 0.76 dB, but in general, there is no a well-established seasonal  
389 effect on  $\sigma^0_{VV}$  and the sign of the difference between summer and winter  $\sigma^0_{VV}$  varied.  $\sigma^0_{VV}$



390 was considered relatively stable throughout the year while  $\sigma^0$ VH responds significantly to the  
391 seasonal vegetation cycle. In Rüetschi et al. (2018), the behavior of  $\sigma^0$ VH was also verified over  
392 a whole region at the S-1pixel scale. Deciduous stands, composed mainly of oak and beech,  
393 showed most often a lower VH backscattering in summer than in winter. An opposite behavior  
394 was observed on coniferous stands, composed mainly of spruce, for which the  $\sigma^0$ VH is higher  
395 in summer than in winter. Dostálová et al. (2016; 2018) also observed a clear decrease in S-1  
396 VH signal during the spring and an increase during the senescence transition stage in the range  
397 of 0.5 to 2 dB in broadleaf forests of oak, beech, maple and birch trees. Similar results were  
398 obtained by Frison et al. (2018) over the whole Fontainebleau forest massif to which the  
399 Fontainebleau-Barbeau forest (our study site) belongs. The authors observed a decrease  
400 in  $\sigma^0$ VH in spring from -12.5 to -15 dB, while  $\sigma^0$ VV remains relatively constant.

401 Rüetschi et al. (2018) and Dostálová et al. (2016; 2018) explained the decrease in VH  
402 backscatter during the growing season, when leaf biomass is at its maximum, by a lower  
403 contribution of branches to backscattering, considered more reflective than leaves in C-band,  
404 and by a lower contribution of soil masked by foliage.

405 The sensitivity of  $\sigma^0$ VH and VV/VH to phenology shown in our study (Figures 1 and S3)  
406 and in Rüetschi et al. (2018), Dostálová et al. (2016; 2018) and Frison et al. (2018),  
407 characterized by a decrease of the former and an increase of the latter during the summer, is  
408 different from what can be observed on various types of crops as shown in many studies  
409 (Veloso et al., 2017; Khabbazan et al., 2019; Stendardi et al., 2019; Dostálová et al., 2018) in  
410 which an increase in  $\sigma^0$ VH signal and a decrease in VV/VH ratio when biomass increases in  
411 maize, soybean, sunflower, potatoes crops and in alpine meadows. In those studies, the increase  
412 of  $\sigma^0$ VH backscattering was explained by the increase in vegetation volume scattering acting as  
413 the main backscatter.

414 As underlined above, VV/VH ratio is more dynamic than  $\sigma^0$ VH and  $\sigma^0$ VV and better  
415 describes the seasonal dynamics of the canopy (Figures 1 & S3). VV/VH is also known to be  
416 more stable and able to reduce the soil moisture and soil-vegetation interactions effects  
417 (Vreugdenhil et al., 2018; Veloso et al., 2017). As shown in Figure 2, S-1 VV/VH reproduces

418 the annual cycle of phenological events observed in deciduous forests with varying degrees of  
419 fidelity.

420 The estimated phenological dates using MOS marker from VV/VH time-series are in  
421 agreement with the observed dates, with a positive bias of about 8 days during spring (Figure  
422 3). A similar bias is obtained using the LAI time series. Indeed, during the spring transition  
423 phase (Figure 2), we observe that time-series of VV/VH overlap with those of LAI but deviate  
424 very significantly during the fall phase. During this phase, temporal patterns of VV/VH are  
425 positively shifted with respect to those of LAI. It can also be noted that temporal patterns of  
426 litterfall are also positively shifted in comparison to temporal patterns of LAI estimated from  
427 transmitted PAR. The average bias between estimates of the senescence date decreases from  
428 about 27 days between VV/VH and LAI to about 7 days between VV/VH and litterfall. During  
429 the senescence and compared to *in situ* and S-2 NDVI, VV/VH provides estimates that are  
430 generally later, between 4 and 30 days, with an average bias of 17 days compared to *in situ*  
431 NDVI and between -19 and 42 days and an average bias of 20 days with S-2 NDVI.

432 While during the spring phase, the patterns of VV/VH, LAI and NDVI from *in situ* and S-2  
433 data, are relatively close, they deviate very strongly during the senescence phase causing large  
434 differences in the estimation of senescence dates (Figure 2). During this phase, VV/VH decay  
435 seems to more closely follow the temporal dynamics of litterfall than the LAI or NDVI decay.  
436 These results show that the relationships between VV/VH and LAI or NDVI are not stable but  
437 depend on the phenological stage considered. For the same LAI or NDVI, the VV/VH signal is  
438 generally weaker during the spring phenological stage than during senescence (Figure 4). This  
439 implies that the canopy characteristics that modulate these variables are different. During  
440 spring, the concomitance of VV/VH increase with the increase of LAI and to a lesser extent  
441 with NDVI reflects the sensitivity of VV/VH, and particularly VH, to leaf emergence and  
442 expansion. Leaf area development and growth act both in terms of number and geometrical  
443 properties of scattering elements composed of leaves and young twigs, changes in their  
444 dielectric properties especially through leaf water content and by masking the contribution of  
445 trunks, branches, and soil. It is very likely that this last factor is the most important because

446 trees of the Fontainebleau-Barbeau forest are about 150 years old and the contribution of the  
447 woody parts is expected to play a major role in winter and to decrease as LAI increases during  
448 the spring. During this phenological stage, foliage development and expansion also modulate  
449 NDVI and LAI very strongly although they also depend on canopy structure and leaf structural  
450 and biochemical characteristics. During the senescence phase, the onset of VV/VH decline,  
451 estimated from the SOF criterion, is later than for NDVI and LAI and practically synchronous  
452 with litterfall. NDVI decreases before leaf fall due to leaf yellowing and browning that  
453 characterize autumn leaf senescence. During this period, in addition to the decrease in leaf  
454 chlorophyll content which is the main cause of the decrease in NDVI, leaf water content and  
455 leaf mass also decreased as shown in previous studies (Yang et al., 2016; Yang et al., 2017;  
456 Meerdink et al., 2016). LAI, calculated in this study from transmitted radiation, also decreases  
457 earlier, probably due to an increase of canopy transmissivity caused by a decrease in leaf  
458 chlorophyll content during this period. Therefore, VV/VH seems to depend much more on the  
459 amount of scattering elements (leaves, twigs, branches and trunks) which is better described by  
460 litterfall than by NDVI or LAI.

461 While for various types of crops, many studies have shown a positive relationship between  
462 VH backscatter coefficient in C-band and LAI or NDVI (Mandal et al., 2019; Wang et al.,  
463 2019), our results show that, in deciduous forests, these relationships are inverted. Temporal  
464 dynamics of LAI and NDVI is accompanied by a decrease in VH and an increase of VV/VH  
465 ratio. These relationships are also not unique but depend on the phenological stage considered.  
466 The use of S-1 signal in classifications or in fusion with optical remote sensing or its  
467 interpretation should be considered with great care.

## 468 **5. Conclusion**

469 Time-series of Sentinel-1 A and B backscattering coefficients were used to characterize the  
470 seasonal phenological cycles in a temperate deciduous forest over five years. While the  
471 backscattering coefficient in vertical polarization ( $\sigma^{0VV}$ ) remains relatively stable over the  
472 seasons, the backscattering coefficient in cross-polarization ( $\sigma^{0VH}$ ) responds significantly to  
473 the seasonal vegetation cycle, with a behavior that is opposite to what is usually observed on

474 various crops.  $\sigma^0$ VH decreases during spring simultaneously with spring budburst and leaf  
475 expansion, reaches a minimum during the main growing season when canopy leaf area is at its  
476 maximum and increases again simultaneously with leaf fall. The observed  $\sigma^0$ VH seasonal  
477 amplitude is 1.8 dB on average. S-1 time series of VV/VH ratio provides a good description of  
478 the seasonal vegetation cycle, allowing the extraction of spring and autumn phenological  
479 markers. Estimates of budburst dates in spring differ by approximately 8 days on average from  
480 field phenological observations. During the senescence phase, the estimates provided by  
481 VV/VH are late by about 20 days in comparison to field phenological observations and deviate  
482 significantly by about two to four weeks from the estimates provided by *in situ* NDVI, S2-based  
483 NDVI and LAI time-series. While during the spring, temporal pattern of VV/VH correlates  
484 well with LAI and NDVI, during senescence, it is better explained by the dynamics of litterfall.  
485 The deviation between VV/VH and litterfall-based senescence estimates is reduced to about  
486 one week. A hysteresis phenomenon is observed on the relationships between VV/VH and  
487 NDVI or LAI. For the same LAI or NDVI, the response of VV/VH is lower during canopy  
488 foliage increase in spring than during leaf senescence and fall in autumn. These relationships  
489 are not unique and lead to the conclusion that the mechanisms involved in the seasonality of  
490 VV/VH signal are different according to the phenological stage considered. This behavior can  
491 be explained by the preponderant contribution of woody parts in VH polarization  
492 backscattering, which decreases as the forest canopy becomes more and more closed during  
493 spring and summer and increases again during leaf senescence and fall in autumn. The  
494 hysteresis phenomenon shows that attenuation of  $\sigma^0$ VH signal by canopy foliage appears to be  
495 less important during spring and early summer than during senescence. This may be caused by  
496 two opposing mechanisms: a significant role of water content of canopy foliage during the  
497 spring which has the effect of causing an increase of  $\sigma^0$ VH and the role of foliage, which masks  
498 the woody components, and has an opposite effect of causing a decrease in  $\sigma^0$ VH. This last  
499 mechanism appears to be preponderant since  $\sigma^0$ VH decreases during the spring transition as  
500 shown in this study but also in previous studies. During the senescence, the strong relationship  
501 between the  $\sigma^0$ VH increase and the opening of the canopy caused by litterfall suggests that the

502 masking role played by foliage is also dominant. These results show that the interpretation of  
503 S-1 signals over deciduous forest canopies or their use for classification without or after fusion  
504 with optical data must be carried out with great care due to the temporal variability of the  
505 contributions of the different canopy components associated with the seasonal phenological  
506 cycle. The use of physical approaches based on radar backscatter models in forest canopies will  
507 have the advantage of allowing a better understanding and evaluation of the contributions of the  
508 different ecosystem components in the measured signal. It will also provide useful information  
509 to better establish the correspondence between indirect phenological metrics predicted from the  
510 S-1 time series and field phenological observations.

511

## 512 **References**

513 Benninga, H.J.F., van der Velde, R., Su, Z., 2019. Impacts of Radiometric Uncertainty and  
514 Weather-Related Surface Conditions on Soil Moisture Retrievals with Sentinel-1. *Remote*  
515 *Sens.* 2019, 11, 2025.

516 Bolton, D.K., Gray, J.M., Melaas, E.K., Moon, M., Eklundh, L., Friedl, M.A., 2020.  
517 Continental-scale land surface phenology from harmonized Landsat 8 and Sentinel-2 imagery.  
518 *Remote Sens. Environ.* 2020, 240, 111685.

519 Delpierre, N., Berveiller, D., Granda, E., Dufrêne, E., 2016. Wood phenology, not carbon  
520 input, controls the interannual variability of wood growth in a temperate oak forest. *New*  
521 *Phytol.* 210, 459-470.

522 Delpierre, N., Soudani, K., Berveiller, D., Dufrêne, E., Hmimina, G., Vincent, G., 2020.  
523 “Green pointillism”: detecting the within-population variability of budburst in temperate  
524 deciduous trees with phenological cameras. *Int. J. Biometeorol.* 64, 663-670.

525 Denéchère, R., Delpierre, N., Apostol, E., Berveiller, D., Bonne, F., Cole, E., Delzon, S.,  
526 Dufrêne, E., Gressler, E. Jean, F., Lebourgeois, F., Liu, G., Louvet, J., Parmentier, J., Soudani,  
527 K., Vincent, G., 2019. The within-population variability of leaf spring and autumn phenology is  
528 influenced by temperature in temperate deciduous trees. *Int. J. Biometeorol.* 2019.

529 Dostálová, A., Milenkovic, M., Hollaus, M., Wagner, W., 2016. Influence of forest  
530 structure on the Sentinel-1 backscatter variation—Analysis with full-waveform lidar data.  
531 *Proceedings of the ESA Living Planet Symposium, Prague, Czech Republic, 9–13 May 2016.*

532 Dostálová, A., Wagner, W., Milenković, M., Hollaus, M., 2018. Annual seasonality in  
533 Sentinel-1 signal for forest mapping and forest type classification. *Int. J. Remote Sens.*, 1 –23.

534 El Hajj, M., Baghdadi, N., Zribi, M., Angelliaume, S., 2016. Analysis of Sentinel-1  
535 Radiometric Stability and Quality for Land Surface Applications. *Remote Sens.* 2016, 8, 406.

536 ESA – European Space Agency Website:  
537 <https://sentinel.esa.int/web/sentinel/user-guides/sentinel-1-sar/revisit-and-coverage>.

538 Fisher, J.I., Mustard, J.F., Vadeboncoeur, M.A., 2006. Green leaf phenology at Landsat  
539 resolution: Scaling from the field to the satellite. *Remote Sens. Environ.* 100, 265–79.

540 Frison, P.-L., Fruneau, B., Kmiha, S., Soudani, K., Dufrière, E., Le Toan, T., Koleček, T.,  
541 Villard, L., Mougin, E., Rudant, J.-P., 2018. Potential of Sentinel-1 Data for Monitoring  
542 Temperate Mixed Forest Phenology. *Remote Sens.* 2018, 10, 2049.

543 Gielen, B., Acosta, M., Altimir, N. et al., 2018. Ancillary vegetation measurements at  
544 ICOS ecosystem stations. *Int. Agrophys.* 10, 645–664.

545 Hird, J.N., McDermid, G.J., 2009. Noise reduction of NDVI time series: An empirical  
546 comparison of selected techniques. *Remote Sens. Environ.* 113, 248–258.

547 Hmimina, G., Dufrene, E., Pontailier, J.- Y., Delpierre, N., Aubinet, M., Caquet, B., de  
548 Grandcourt, A., Burban, B., Flechard, C., Granier, A., Gross, P., Heinesch, B., Longdoz, B.,  
549 Moureaux, C., Ourcival, J.-M., Rambal, S., Saint-André, L., Soudani, K., 2013. Evaluation of  
550 the potential of MODIS satellite data to predict vegetation phenology in different biomes: An  
551 investigation using ground based NDVI measurements. *Remote Sens. Environ.* 132, 145–158.

552 Jong, J. D., Klaassen, W., Ballast, A., 2000. Rain storage in forests detected with ERS  
553 tandem mission SAR. *Remote Sens. Environ.* 72, 170–180

554 Khabbazan, S., Vermunt, P., Steele-Dunne, S., Ratering Arntz, L., Marinetti, C., van der  
555 Valk, D., Iannini, L., Molijn, R., Westerdijk, K., van der Sande, C. 2019. Crop Monitoring  
556 Using Sentinel-1 Data: A Case Study from The Netherlands. *Remote Sens.* 2019, 11, 1887.

557 Klosterman, S.T., Hufkens, K., Gray, J.M., Melaas, E., Sonnentag, O., Lavine, I., Mitchell,  
558 L., Norman, R., Friedl, M.A., Richardson, A.D., 2014. Evaluating remote sensing of deciduous  
559 forest phenology at multiple spatial scales using PhenoCam imagery. *Biogeosciences Discuss.*  
560 11 (16), 4305–4320.

561 Kowalski, K., Senf, C., Hostert, P., Pflugmacher, D., 2020. Characterizing spring  
562 phenology of temperate broadleaf forests using Landsat and Sentinel-2 time series. *Int. J. Appl.*  
563 *Earth Obs.* 92, 102172.

- 564 Lange, M., Dechant, B., Rebmann, C., Vohland, M., Cuntz, M., Doktor, D., 2017.  
565 Validating MODIS and Sentinel-2 NDVI Products at a Temperate Deciduous Forest Site Using  
566 Two Independent Ground-Based Sensors. *Sensors* 17, 1855.
- 567 Mandal, D., Hosseini, M., McNairn, H., Kumar, V., Bhattacharya, A., Rao, Y.S., Mitchell,  
568 S., Robertson, D.L., Davidson, A., Dabrowska-Zielinska K., 2019. An investigation of  
569 inversion methodologies to retrieve the leaf area index of corn from C-band SAR data. *Int. J.*  
570 *Appl. Earth Obs.* 82, 2019, 101893..
- 571 Meerdink, S.K, Roberts, D.A., King, J.Y., Roth, K.L., Dennison, P.E., Amaral, C.H.,  
572 Hook, S.J., 2016. Linking seasonal foliar traits to VSWIR-TIR spectroscopy across California  
573 ecosystems, *Remote Sens. Environ.* 186, 322–338.
- 574 Ose, K., Corpetti, T., Demagistri, L., 2016. Multispectral Satellite Image Processing.  
575 In N. Baghdadi & M. Zribi (Eds.), *Optical remote sensing of land surface techniques and*  
576 *methods.* Elsevier, 2016, pp 57–124.
- 577 Proisy, C., Mougin, E., Dufrêne, E., Le Dantec, V., 2000. Monitoring seasonal changes of a  
578 mixed temperate forest using ERS SAR observations. *IEEE T. Geosci. Remote Sens.*, 38,  
579 540–552.
- 580 Reed, B.R, White, M.A., Brown, J.F., 2003. Remote sensing phenology. In *Phenology: An*  
581 *Integrative Environmental Science* (ed. Schwartz M.D), Kluwer Academic Publishers, pp.  
582 365–381.
- 583 Richardson, A.D., Black, T.A., Ciais, P., Delbart, N., Friedl, M.A., Gobron, N., Hollinger,  
584 D.Y., Kutsch, W.L., Longdoz, B., Luysaert, S., Migliavacca, M., Montagnani, L., Munger,  
585 J.W., Moors, E., Piao, S., Rebmann, C., Reichstein, M., Saigusa, N., Tomelleri, E., Vargas, R.,  
586 Varlagin, A., 2010. Influence of spring and autumn phenological transitions on forest  
587 ecosystem productivity. *Philos. Trans. R. Soc. Lond., B, Biol. Sci.*, 365,3227–3246.
- 588 Rüetschi, M., Schaepman, E. M., Small, D., 2018. Using Multitemporal Sentinel-1 C-band  
589 Backscatter to Monitor Phenology and Classify Deciduous and Coniferous Forests in Northern  
590 Switzerland. *Remote Sens.* 2018, 10.
- 591 Schaber, J., Badeck, F.W., 2002. Evaluation of methods for the combination of  
592 phenological time series and outlier detection. *Tree Physiol.* 22, 973–982.
- 593 Song, Y., Wang, J., 2019. Mapping Winter Wheat Planting Area and Monitoring Its  
594 Phenology Using Sentinel-1 Backscatter Time Series. *Remote Sens.* 2019, 11, 449.

595 Soudani, K., Delpierre, N., Berveiller, D., Hmimina, G., Pontailler, J.-Y., Seureau, L.,  
596 Vincent, G., Dufrêne, E., 2020. A survey of proximal methods for monitoring leaf phenology in  
597 temperate deciduous forests, *Biogeosciences Discuss.*, doi.org/10.5194/bg-2020-389, in  
598 review, 2020.

599 Soudani, K., le Maire, G., Dufrêne, E., François, C., Delpierre, N., Ulrich, E., Cecchini, S.,  
600 2008. Evaluation of the onset of green-up in temperate deciduous broadleaf forests derived  
601 from Moderate Resolution Imaging Spectroradiometer (MODIS) data. *Remote Sens. Environ.*  
602 12, 2643–2655.

603 Soudani, K., Hmimina, G., Delpierre, N., Pontailler, J.-Y., Aubinet, M., Bonal, D., Caquet,  
604 B., de Grandcourt, A., Burban, B., Flechard, C., Guyon, D., Granier, A., Gross, P., Heinesh, B.,  
605 Longdoz, B., Loustau, D., Moureaux, C., Ourcival, J.-M., Rambal, S., Saint André, L., Dufrêne,  
606 E., 2012. Ground-based Network of NDVI measurements for tracking temporal dynamics of  
607 canopy structure and vegetation phenology in different biomes. *Remote Sens. Environ.* 123,  
608 234–245.

609 Stendardi, L., Karlsen, S.R., Niedrist, G., Gerdol, R., Zebisch, M., Rossi, M., Notarnicola,  
610 C., 2019. Exploiting Time Series of Sentinel-1 and Sentinel-2 Imagery to Detect Meadow  
611 Phenology in Mountain Regions. *Remote Sens.* 2019, 11, 542.

612 Sudmanns, M., Tiede D., Augustin, H., Lang, S., 2019. Assessing global Sentinel-2  
613 coverage dynamics and data availability for operational Earth observation (EO) applications  
614 using the EO-Compass. *Int. J. Digit. Earth* 1–17.

615 Vavlas, N.-C., Waine, T.W., Meersmans, J., Burgess, P.J., Fontanelli, G., Richter, G.M.,  
616 2020. Deriving Wheat Crop Productivity Indicators Using Sentinel-1 Time Series. *Remote*  
617 *Sens.* 2020, 12, 2385.

618 Veloso, A., Mermoz, S., Bouvet, A, Le Toan, T, Planells, M, Dejoux, J-F, Ceschia, E.,  
619 2017. Understanding the temporal behavior of crops using Sentinel-1 and Sentinel-2-like data  
620 for agricultural applications, *Remote Sens. Environ.* 199, 2017, 415–426.

621 Vreugdenhil, M., Wagner, W., Bauer-Marschallinger, B., Pfeil, I., Teubner, I., Rüdiger, C.,  
622 Strauss, P., 2018. Sensitivity of Sentinel-1 Backscatter to Vegetation Dynamics: An Austrian  
623 Case Study. *Remote Sens.* 2018, 10, 1396.

624 Vrieling, A., Meroni M., Darvishzadeh, R., Skidmore, A.K., Wang T., Zurita-Milla, R.,  
625 Oosterbeek, K., O'Connor B., Paganini, M., 2018. Vegetation phenology from Sentinel-2 and  
626 field cameras for a Dutch barrier island. *Remote Sens. Environ.* 2018, 215, 517–529.



627        Yang, X, Tang J, Mustard, JF., Wu J., Zhao K., Serbin S. Lee J.E., 2016. Seasonal  
628        variability of multiple leaf traits captured by leaf spectroscopy at two temperate deciduous  
629        forests. *Remote Sens. Environ.*, 179, 1–12.

630        Yang, H., Yang, X., Heskell, M., Sun, S., Tang, J., 2017. Seasonal variations of leaf and  
631        canopy properties tracked by ground-based NDVI imagery in a temperate forest. *Sci Rep.* 2017,  
632        7(1):1267.

633        Wang, J., Xiao, X., Bajgain, R., Starks, P., Steiner, J., Doughty, R.B., Chang, Q., 2019.  
634        Estimating leaf area index and aboveground biomass of grazing pastures using Sentinel-1,  
635        Sentinel-2 and Landsat images. *ISPRS J. Photogramm. Remote Sens.* 154, 189–201.

636        Wang, Q., Atkinson, P.M., 2018. Spatio-temporal fusion for daily Sentinel-2 images.  
637        *Remote Sens. Environ.* 204, 31–42.

638        White, J.C, Wulder, M.A. 2013. The Landsat observation record of Canada: 1972-2012.  
639        *Can. J. Remote Sensing*, 39, 6, 455–467.

640

641

642

643 **Supplementary Materials**

644

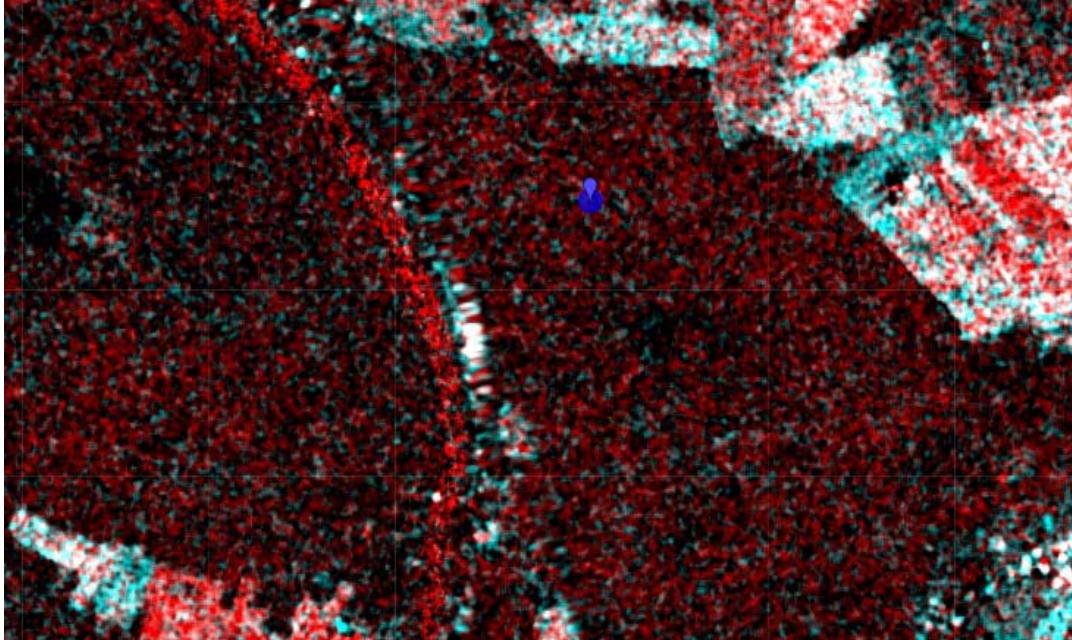

645 Figure S1: Fontainebleau-Barbeau forest location in France ( $48^{\circ}28'26''\text{N}$ ,  $2^{\circ}46'57''\text{E}$ ). The blue  
646 circle with a radius of 50 m is centered on Fontainebleau-Barbeau flux tower (FR-Fon, ICOS  
647 network). The image is a Sentinel-1 RGB composite where average VV/VH during the summer  
648 (15/06/2018 - 31/08 2018) in red, average VV/VH during the winter (01/01 – 28/02 2018) in  
649 green and blue.  
650

651

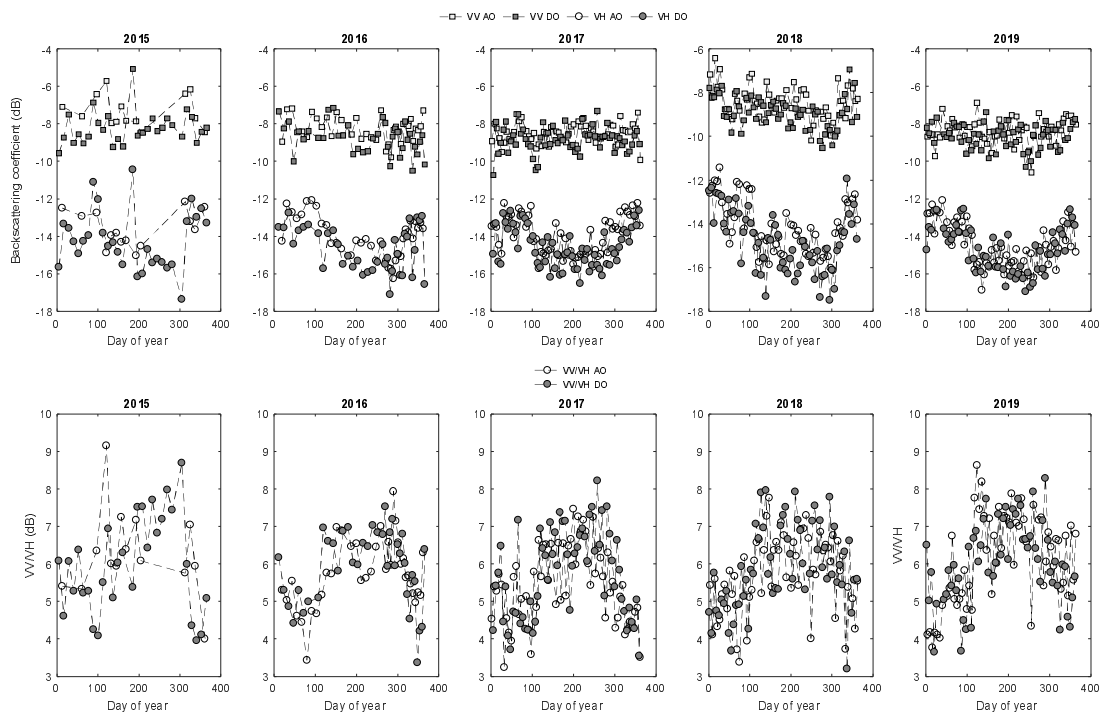

652

653 Figure S2: SAR backscattering coefficients  $\sigma^0$  in VV and VH polarizations and VV/VH ratio  
654 time-series from Sentinel-1 A&B. circle: VH polarization, square: VV polarization. Empty  
655 (circles and squares) in ascending orbit and filled in descending orbit.

656

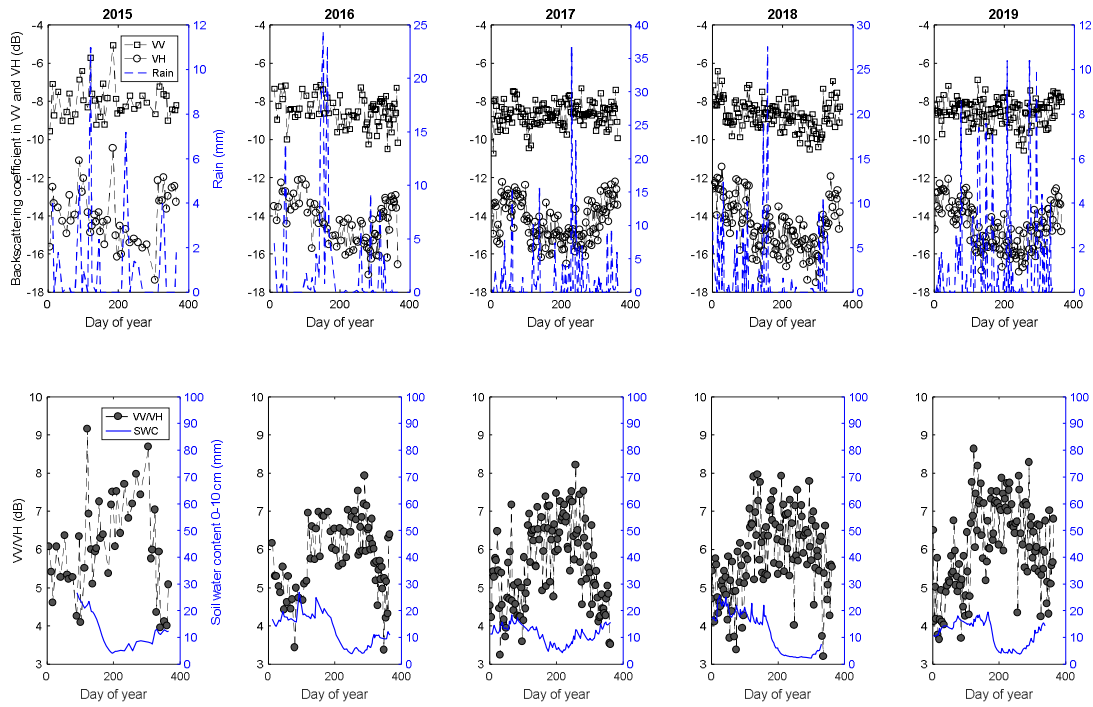

657

658 Figure S3: Sentinel-1  $\sigma^0$ VV (square symbol),  $\sigma^0$ VH (circle symbol) and VV/VH (filled circle)  
659 time-series over 2015-2019 period (right axis). In blue (left axis), rain (upper panel) and soil  
660 water content (0-10 cm) in mm (lower panel).  
661

662

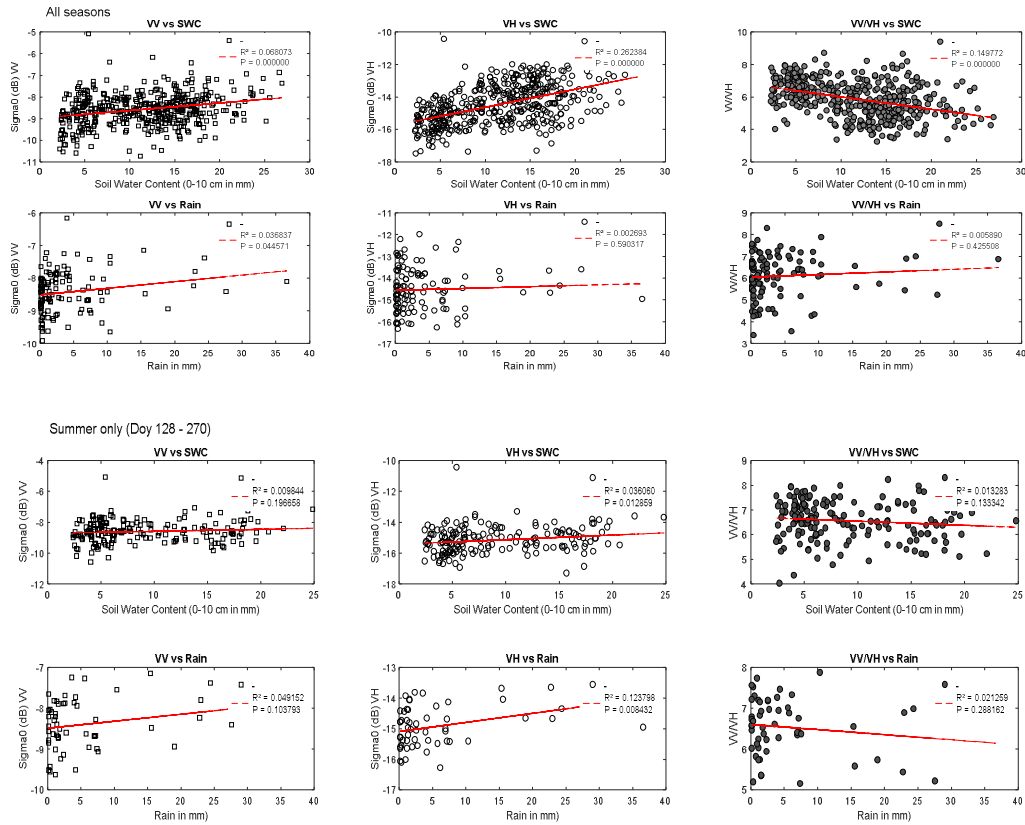

663 Figure S4: Linear regressions between Sentinel-1 data and soil water content (0-10 cm depth)  
664 and rain during the year (all seasons – upper panel) and during summer season (lower panel).  
665

666 Table S5: observed and estimated dates of onset of greenness in spring and leaf senescence and  
 667 fall based on field phenological observations and time-series of Sentinel-1 VV/VH,  
 668 ground-based normalized difference vegetation index (NDVI), Leaf area index (LAI), Litterfall  
 669 and Sentinel-2 NDVI.

|                           | Budburst and leaf expansion |     |     | Leaf senescence and fall |     |     |
|---------------------------|-----------------------------|-----|-----|--------------------------|-----|-----|
|                           | SOS                         | MOS | EOS | SOE                      | MOE | EOE |
| Phenological observations |                             |     |     |                          |     |     |
| 2015                      | 101                         | 106 | 109 | 267                      | 290 | 312 |
| 2016                      | 102                         | 109 | 115 | 282                      | 300 | 317 |
| 2017                      | 89                          | 99  | 108 | 267                      | 294 | 321 |
| 2018                      | -                           | 105 | -   | -                        | -   | -   |
| 2019                      | -                           | 109 | -   | -                        | -   | -   |
| Sentinel-1 VV/VH          |                             |     |     |                          |     |     |
| 2015                      | 110                         | 113 | 113 | 312                      | 323 | 332 |
| 2016                      | 100                         | 123 | 144 | 304                      | 321 | 336 |
| 2017                      | 100                         | 117 | 130 | 273                      | 297 | 318 |
| 2018                      | 89                          | 104 | 115 | 292                      | 323 | 350 |
| 2019                      | 99                          | 111 | 121 | 252                      | 321 | 388 |
| In situ NDVI              |                             |     |     |                          |     |     |
| 2015                      | 102                         | 107 | 112 | 272                      | 293 | 314 |
| 2016                      | 103                         | 113 | 123 | 280                      | 302 | 324 |
| 2017                      | 90                          | 101 | 111 | 255                      | 293 | 332 |
| 2018                      | 100                         | 106 | 112 | 272                      | 311 | 349 |
| 2019                      | 96                          | 108 | 119 | 273                      | 306 | 339 |
| Leaf Area Index           |                             |     |     |                          |     |     |
| 2015                      | 100                         | 113 | 124 | 251                      | 287 | 322 |
| 2016                      | 103                         | 120 | 137 | 263                      | 296 | 329 |
| 2017                      | 90                          | 111 | 131 | 248                      | 288 | 327 |
| 2018                      | 102                         | 111 | 119 | 231                      | 287 | 341 |
| 2019                      | 98                          | 115 | 131 | 250                      | 292 | 334 |
| Litter fall               |                             |     |     |                          |     |     |
| 2015                      | -                           | -   | -   | 266                      | 301 | 309 |
| 2016                      | -                           | -   | -   | 298                      | 312 | 324 |
| 2017                      | -                           | -   | -   | 273                      | 300 | 322 |
| 2018                      | -                           | -   | -   | 281                      | 316 | 331 |
| 2019                      | -                           | -   | -   | 288                      | 317 | 329 |
| S-2 NDVI                  |                             |     |     |                          |     |     |
| 2015                      |                             |     |     |                          |     |     |
| 2016                      | 115                         | 118 | 124 | 261                      | 285 | 320 |
| 2017                      | 105                         | 113 | 121 | 303                      | 316 | 328 |
| 2018                      | 106                         | 111 | 115 | 192                      | 281 | 368 |
| 2019                      | 83                          | 99  | 114 | 253                      | 296 | 337 |

670

671

672

673

674

675
